# Supplementary material for: Dietary Antioxidant Trans-Cinnamaldehyde Reduced Visfatin-Induced Breast Cancer Progression: In Vivo and In Vitro Study
Source: MDPI journal article supplement (doi:10.3390/antiox8120625), 2019-12-06
Supplement: s1 [file s1]

**Table S1. Primary antibodies used in this study**

| Antibody | Brand          | Catalog    | Dilution |
|----------|----------------|------------|----------|
| GAPDH    | Proteintech    | HRP-60004  | 1:10000  |
| NAMPT    | Proteintech    | 11776-1-AP | 1:1000   |
| p-mTOR   | Cell signaling | 2971S      | 1:1000   |
| mTOR     | Cell signaling | 2972S      | 1:1000   |
| p-PI3K   | Cell signaling | 4228S      | 1:1000   |
| PI3K     | Cell signaling | 4257S      | 1:1000   |
| PCNA     | Cell signaling | 13110S     | 1:1000   |

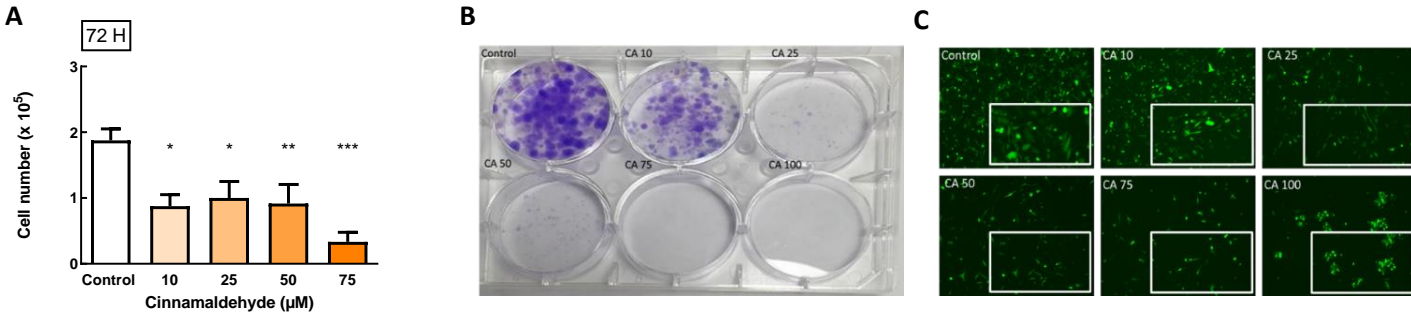

**Figure S1. Effect of CA on breast cancer cell (A) Cell counting, treated with CA 72 h; (B) Colony formation, effects of CA on MDA-MB-231-GFP cells after 72 h and maintained for 1 week (C) Cell morphology, treated with CA 72 h. \* $p < 0.05$ , \*\* $p < 0.01$ , \*\*\*,  $p < 0.001$  compared with control group.**

A

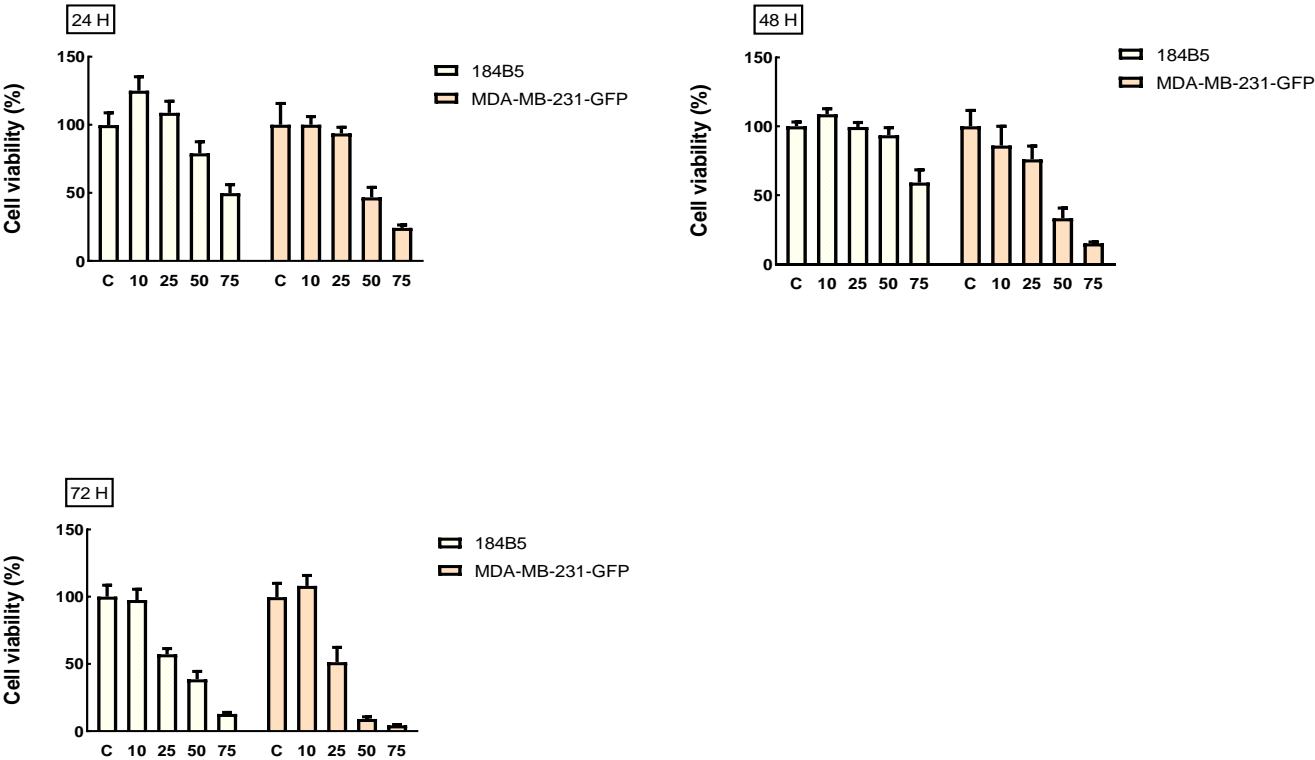

B

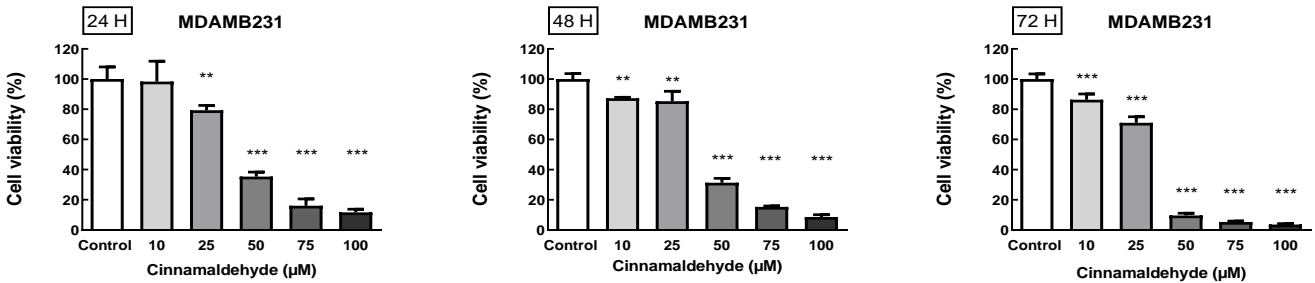

Figure S2. Effect of CA on normal epithelial cell, MDA-MB-231 and MDA-MB-231-GFP breast cancer cell (A) Effects of CA on 184B5 and MDA-MB-231-GFP cells. (B) Effect of CA on MDAMB231 cells.  $p < 0.05$ , \*\* $p < 0.01$ , \*\*\* $p < 0.001$  compared with control group.

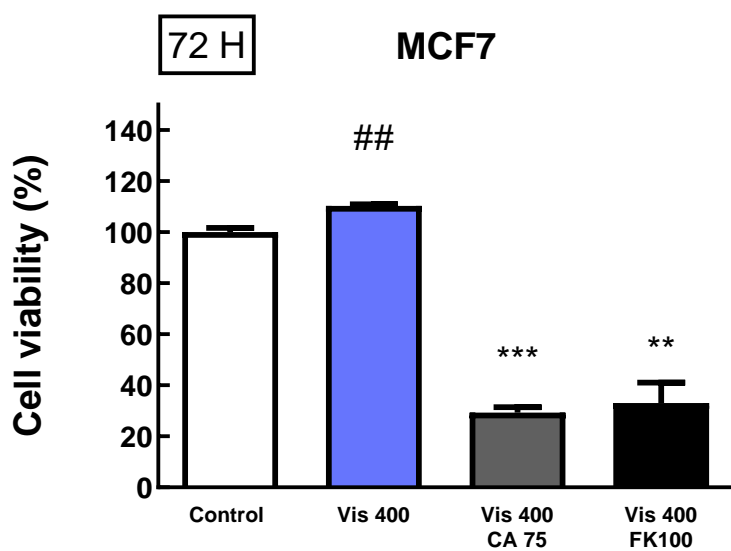

Figure S3. Effects of visfatin combined with CA and FK866 on MCF-7.

## $p < 0.01$  compared with control group; \*\* $p < 0.01$ , \*\*\*,  $p < 0.001$  compared with visfatin group

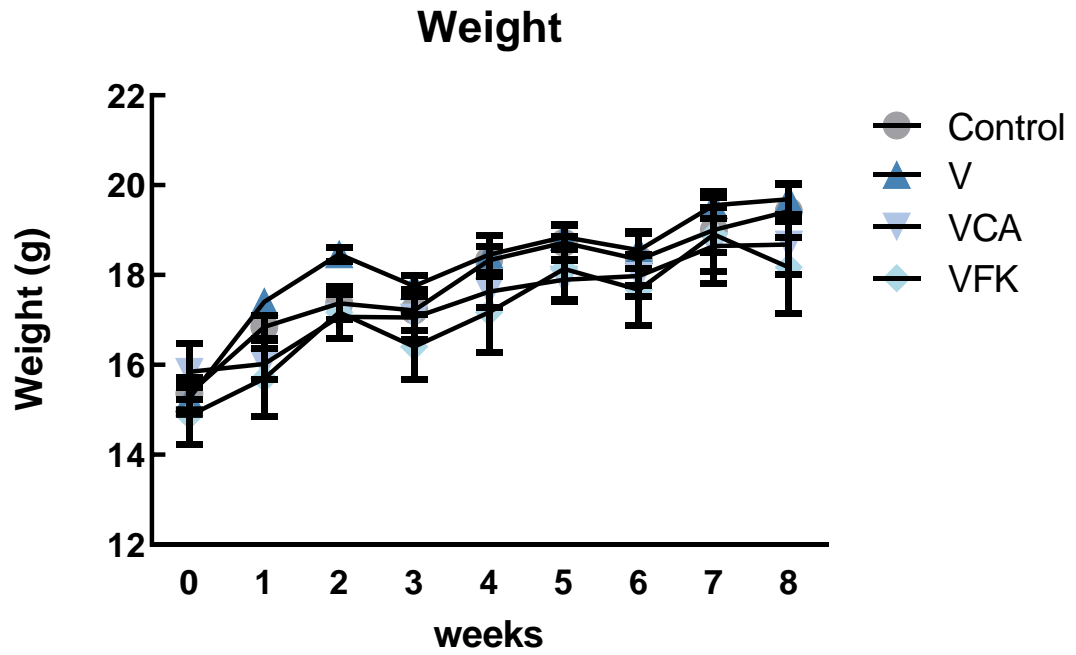

Figure S4. The body weights and organ weights between the groups; there was no significant difference observed between the groups.
